# Supplementary material for: Lake Stars as an Earth Analog for Europa’s Manannán Crater Spider Feature
Source: Research Square preprint supplement (doi:10.21203/rs.3.rs-6173657/v1), 2025-04-04
Supplement: Supplementary file 1 [file 1ba3f43483f51e72406bbd74.xlsx]

## Sheet: Sheet1
	Ice Sample	Trial	Height Ice (cm)	T atmosphere	T Ice (degC)	T water (degC)	V Water (ml)	t Flow (s)	Spider pattern?	Stream Order	No. Branches	Center Width (cm)	Pool width	Notes
	Non-salty granular ice	1	0.5	0.6	-5	20	<150	20	Y	2	26	3	19
		2	0.3	0.2	-2.9	19	<150	30	Y	2	44	9	18	Frozen center formed, broke into water. large centre then developed.
		3	0.2	-0.5	-11	2	<150	55	Y	2	20	2.5	18	Observed fingers. Feature was fainter than higher deltaT
	2.3 wt% granular ice	1	0.3	0.5	-6	18	<150	16	Y	2	15	4.5	19	Could see branches develop, then with more water they `fell in'. Water melted more easily with salt. As it froze again, could see the channels better.
		2	0.5	-0.5	-4	6	<150	24	Y	undetermined	undetermined	undetermined	undetermined	Very faint pattern. After we stopped the flow, we could see slight patterns of where the grains possibly melted slightly but froze again
		3	0.3	0.1	-5	3	<150	18	Y	1	20	8	19	We restarted the flow and could see faint branches deepen even more before freezing again
	Fine (20um) granular ice	1	0.5	-70	~-70 (estimate -100)	19	<150	76	Y	2	11	undetermined	undetermined	One leg developed
		2	0.5	22	<-50	22	<150	22	Y	2	26	undetermined	undetermined
		3	0.5	21	<-50	21	<150	45	undetermined	undetermined	undetermined	undetermined	undetermined	Thought we saw branches develop underneath.
		4	0.6	21	<-50	21	<150	56	Y	undetermined	undetermined	undetermined	undetermined	We lifted the ice up after and saw very interesting branches like isolated veins which were not connected to the center
