# Supplementary material for: Lake Stars as an Earth Analog for Europa’s Manannán Crater Spider Feature
Source: Research Square preprint supplement (doi:10.21203/rs.3.rs-6173657/v1), 2025-04-04
Supplement: Supplementary file 1 [file 11a2135eff35cd5326000007.pdf]

# Lake Stars as an Earth Analog for Europa's Manannán Crater Spider Feature

## Supplementary Information

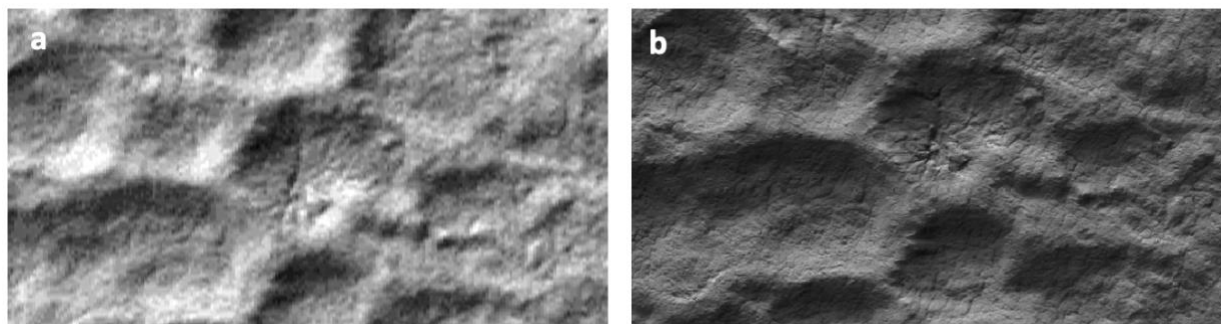

**Supplementary Figure 1:** Image of a Martian spider at  $-87.95^{\circ}\text{N}$ ,  $91.726^{\circ}\text{E}$  showing how a dendritic spider pattern might appear 'asterisk-like' at lower resolutions. (a) shows an example of a spider (300 m in diameter) in the Murray Lab CTX global mosaic (6km/pixel) and (b) shows the spider in a HiRISE image (25 cm/pixel)

| ID                   | Target $\text{MgSO}_4$ Conc.<br>[wt.%] | Actual $\text{MgSO}_4$ Conc.<br>[wt. %] | Avg. Grain Diameter<br>[ $\mu\text{m}$ ] |
|----------------------|----------------------------------------|-----------------------------------------|------------------------------------------|
| DIWICE-076-000       | 0.0                                    | N/A                                     | $317 \pm 127$                            |
| DIWICE-147-000       | 0.0                                    | N/A                                     | $222 \pm 93$                             |
| MGSO4ICE-009/010-000 | 2.3                                    | $3.2 \pm 0.1$ (n = 6)                   | $169 - 218 \pm 140$                      |

**Supplementary Table 1:** Granular ice grain diameter and concentration.
